# Supplementary material for: Do Black and Asian individuals wait longer for treatment? A survival analysis investigating the effect of ethnicity on time-to-clinic and time-to-treatment for diabetic eye disease
Source: Springer Nature journal article supplement (doi:10.1007/s00125-020-05364-5), 2021-01-26
Supplement: MOESM1 [file 18801320]

## ELECTRONIC SUPPLEMENTARY MATERIAL

### ESM Table 1

**Ethnicity groups by census classification.** Definitions of ethnicity groups used in this study and corresponding UK census categories.

| <b>Ethnicity group</b> | <b>Census categories included</b>                                                                                       |
|------------------------|-------------------------------------------------------------------------------------------------------------------------|
| White                  | British, Irish, any other White background                                                                              |
| Black                  | Caribbean, African, any other Black background                                                                          |
| Asian                  | Indian, Pakistani, Bangladeshi, Chinese, any other Asian background                                                     |
| Mixed/Other            | White and Black Caribbean, White and Black African, White and Asian, any other Mixed background, any other Ethnic group |

### ESM Table 2

**Indices of multiple deprivation (IMD).** Indices of multiple deprivation calculated by comparing Lower-layer Super Output Areas to census data in England and placed in deciles.

| <b>IMD decile by LSOA</b> | <b><i>n</i></b> | <b>%</b> |
|---------------------------|-----------------|----------|
| 1 (most deprived area)    | 108             | 6.4      |
| 2                         | 651             | 38.8     |
| 3                         | 349             | 20.8     |
| 4                         | 235             | 14.0     |
| 5                         | 157             | 9.4      |
| 6                         | 77              | 4.6      |
| 7                         | 41              | 2.4      |
| 8                         | 33              | 2.0      |
| 9                         | 20              | 1.2      |
| 10 (least deprived area)  | 5               | 0.3      |

IMD, index of multiple deprivation; LSOA, Lower-layer Super Output Area

**ESM Table 3**

**Comparison of the ethnicity profiles by population.** Comparison of the general population of the London Boroughs of Lambeth and Southwark with the South-East London DESP screening population and study population. \* Obtained from 2011 national census (20). \*\* Obtained from 2018 DESP audit (22).

| Ethnicity    | General population of Lambeth & Southwark* |           | DESP screening population** |           | Referred to hospital (study population) |           |
|--------------|--------------------------------------------|-----------|-----------------------------|-----------|-----------------------------------------|-----------|
|              | <i>n</i>                                   | %         | <i>n</i>                    | %         | <i>n</i>                                | %         |
| Black        | 156,053                                    | <b>26</b> | 6655                        | <b>44</b> | 866                                     | <b>52</b> |
| White        | 329,374                                    | <b>56</b> | 4675                        | <b>31</b> | 495                                     | <b>30</b> |
| Asian        | 48,130                                     | <b>8</b>  | 1521                        | <b>10</b> | 169                                     | <b>10</b> |
| Mixed/Other  | 57,812                                     | <b>10</b> | 1089                        | <b>7</b>  | 146                                     | <b>9</b>  |
| Not Declared | -                                          | -         | 1038                        | <b>7</b>  | -                                       | -         |
| <b>Total</b> | <b>591,369</b>                             |           | <b>14,978</b>               |           | <b>1676</b>                             |           |

DESP, Diabetic Eye Screening Programme

**ESM Table 4**

**Comparison of event rates by ethnicity.** Pearson's chi-squared test probabilities showing no significant difference in observed frequencies by ethnicity.

| Event recorded at least once in either eye during the study period | Ethnicity |           |          |           |          |           | Pearson's chi-squared test probability |
|--------------------------------------------------------------------|-----------|-----------|----------|-----------|----------|-----------|----------------------------------------|
|                                                                    | Black     |           | White    |           | Asian    |           |                                        |
|                                                                    | <i>n</i>  | %         | <i>n</i> | %         | <i>n</i> | %         |                                        |
| Macular laser                                                      | 53        | <b>6</b>  | 29       | <b>6</b>  | 8        | <b>5</b>  | 0.983                                  |
| Anti-VEGF                                                          | 66        | <b>8</b>  | 37       | <b>7</b>  | 12       | <b>7</b>  | 0.972                                  |
| PRP laser                                                          | 65        | <b>8</b>  | 55       | <b>11</b> | 12       | <b>7</b>  | 0.066                                  |
| VA loss of $\geq 10$ letters                                       | 213       | <b>25</b> | 112      | <b>23</b> | 44       | <b>26</b> | 0.592                                  |
| Total participants                                                 | 866       |           | 495      |           | 169      |           | -                                      |

PRP, pan-retinal photocoagulation; VA, visual acuity; VEGF, vascular endothelial growth factor
